# Supplementary material for: A New Laboratory Workflow Integrating the Free Light Chains Kappa Quotient into Routine CSF Analysis
Source: Biomolecules. 2022 Nov 15;12(11):1690. doi: 10.3390/biom12111690 (PMC9687331; doi:10.3390/biom12111690)
Supplement: Supplementary file 1 [file biomolecules-12-01690-s001.zip › supplemental_material_biomolecules_Table S1.pdf]

*Table S1.* CSF-serum values as well as quotient and resulting IF of the hypothetical patient in case of normal- and increased FLC $\kappa$  serum values as well as with- or without intrathecal FLC $\kappa$  synthesis.

|             | FLC $\kappa$ CSF<br>(mg/L) | FLC $\kappa$ serum<br>(mg/L) | QFLC $\kappa$ | IF FLC $\kappa$ (%) |
|-------------|----------------------------|------------------------------|---------------|---------------------|
| Patient 1-A | 0.13                       | 18.3                         | 7.10          | 0                   |
| Patient 1-B | 0.39                       | 54.9                         | 7.10          | 0                   |
| Patient 1-C | 0.76                       | 54.9                         | 13.84         | 0                   |
| Patient 1-D | 0.5                        | 18.3                         | 27.32         | 7.3                 |
